# Supplementary material
Source: ML conference proceedings conference paper supplement (https://openaccess.thecvf.com/content/ICCV2021/html/Jia_Exploring_Visual_Engagement_ICCV_2021_paper.html)
Supplement: Supplementary file 1 [file Jia_Exploring_Visual_Engagement_ICCV_2021_supplemental.pdf]

## A. Qualitative Analysis

Fig. 8 presents more predicted examples including images with dogs and parks. It further shows that ImageNet based pre-training methods tend to map certain objects to a certain set of emotions. VisE, on the other hand, is able to predict correct emotions in these examples.

## B. Supplementary Results and Discussion

**Transfer learning on ImageNet** Table 4 presents results and comparisons on ImageNet. We fine-tune VisE-250M with a ResNeXt-101 backbone on ImageNet, and compare the `val` accuracy scores with the same ResNeXt-101 model trained from scratch (IN-Sup). We also show the results of IG-940M-IN [55], which is pre-trained on 940 million images with 1.5K hashtags and fine-tuned on ImageNet using the same visual backbone. We see from Table 4 that representations learned from VisE-250M with engagement signals are transferable to ImageNet, outperforming the IN-Sup model by 0.88 (1.12%) measured by Top-1 accuracy. Note that engagement signals are relatively weak compared to the hashtags used in IG-940M-IN, which were selected to match with 1000 ImageNet synsets. Our goal here is to show features learned by VisE can be generalized to large-scale image classification tasks.

**Images vs. engagement signals** To disentangle the effect of training images and engagement signals, we also trained MoCo-v2 with the same 1.23 million social post data (VisE-1.2M(MoCo-v2)). Table 5 shows the linear evaluation results on UnbiasedEmotion, which shows the engagement signals, not the images, are beneficial for this dataset. We will include the full results in the final version.

**Additional results** Table 6 and 7 present full transfer learning results including performance on the `val` split and an additional metric for the Hateful Memes dataset. These two tables can be read in conjunction with the main figure and the backbone ablation studies in the main text. Note that we use in-house baselines instead of copying results from prior work for fair-comparison purposes. All the experiments are trained using the same grid search range, validation set, learning rate schedule, *etc.* We use validation accuracy and ROC AUC for Hateful Memes to select the best set of hyper-parameters. See Appendix C.3 for details.

### Datasize calculation for contrastive learning methods

In size ablation studies, we sort all pre-training methods by the training inputs size. We consider the negative input pairs for MoCo-v2 and CLIP as the *effective* training data size.

- **MoCo-v2** uses image pairs from ImageNet as inputs. The total class size is the total number of training data (1.28 million). The effective training data size is the number of image pairs used, which is  $(k + 1) \times 1.28M = 83.9B$ , where  $k = 65536$  is the number of images in the queue for MoCo-v2.
- **CLIP** uses a dataset with 400M image-text pairs. This approach considers the pair-wise similarity among image-text

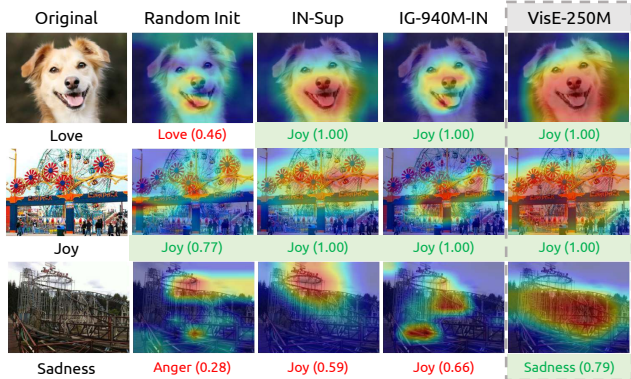

Figure 8. Qualitative results on UnbiasedEmotion dataset using ResNeXt-101  $32 \times 16d$  backbone.

| Method          | Top 1 Accuracy        | Top 5 Accuracy       |
|-----------------|-----------------------|----------------------|
| IN-Sup          | 78.78                 | 94.12                |
| VisE-250M       | 79.66 $\uparrow 0.88$ | 94.62 $\uparrow 0.5$ |
| IG-940M-IN [55] | 84.2                  | 97.2                 |

Table 4. Fine-tuned experiments on ImageNet with ResNeXt-101  $32 \times 16d$  backbone. Colored text with  $\uparrow$  indicate the differences between VisE and IN-Sup.

| Method              | Val Accuracy                      | Test Accuracy                     |
|---------------------|-----------------------------------|-----------------------------------|
| VisE-1.2M (MoCo-v2) | 27.96 $\pm 2.91$                  | 27.80 $\pm 2.30$                  |
| VisE-1.2M           | 44.67 $\pm 3.52$ $\uparrow 16.71$ | 45.74 $\pm 2.15$ $\uparrow 17.94$ |

Table 5. Linear evaluation experiments on UnbiasedEmotion with ResNet-50 using the same 1.23 million data.

in a batch during training. Since the batch size is 32768, the total effective datasize is  $400M / 32768 \times 32768 \times 32768 = 83.9B$ .

## C. Reproducibility Details

### C.1. VisE Pre-training Setup

**Optimization** VisE models are trained on 32 GPUs across 4 machines with a batch size of 1920 images for the ResNet backbone and 1536 for the ResNeXt backbone. We use stochastic gradient descent with a momentum of 0.9 and a weight decay of 0.0001. The base learning rate is set according to  $0.1/256 \times b$ , where  $b$  is the batch size used for the particular model. The learning rate is warmed up linearly from 0 to the base learning rate during the first 5% of the whole iterations. The learning rate decay schedule is set differently for VisE-1.2M and VisE-250M. For models that use 1.23 million images, we follow common ImageNet pre-training settings. For models that are trained with 250 million images, the learning rate is reduced 10 times over approximately 10 epochs with the scaling factor of 0.5.

**Training details** We adopt standard image augmentation strategy during training (randomly resize crop to  $224 \times 224$  and random horizontal flip). Since the dataset is not balanced, we

| Backbone                | Method                                    | UnbiasedEmotion           |                           | Politics           |                    | Hateful Memes         |                    |  |
|-------------------------|-------------------------------------------|---------------------------|---------------------------|--------------------|--------------------|-----------------------|--------------------|--|
|                         |                                           | Val Accuracy              | Test Accuracy             | Val Accuracy       | Test Accuracy      | ROC AUC               | Accuracy           |  |
| ResNet-50               | Random Init                               | 24.67 ± 2.78              | 23.80 ± 1.02              | 56.80              | 56.57              | 0.5335                | 51.64              |  |
|                         | Uni-modality pre-training methods         |                           |                           |                    |                    |                       |                    |  |
|                         | IN-Sup                                    | 43.62 ± 2.31              | 44.36 ± 1.09              | 59.31              | 59.45              | 0.5691                | 53.16              |  |
|                         | VQAGrid [35]                              | 32.17 ± 1.22              | 33.57 ± 0.86              | 57.32              | 57.31              | 0.5517                | 53.2 ↑0.04         |  |
|                         | Cross-modalities pre-training methods     |                           |                           |                    |                    |                       |                    |  |
|                         | VirTex [12]                               | 40.59 ± 2.96              | 42.17 ± 1.14              | 58.46              | 58.44              | 0.5659                | 54.40 ↑1.24        |  |
|                         | ICMLM <sub>att-fc</sub> [2]               | 23.81 ± 2.25              | 23.51 ± 1.52              | 58.27              | 58.41              | 0.5702 ↑0.0011        | 53.32 ↑0.16        |  |
|                         | ICMLM <sub>ifm</sub> [2]                  | 31.71 ± 2.02              | 31.87 ± 0.95              | 58.73              | 58.86              | 0.5631                | 53.24 ↑0.08        |  |
|                         | Contrastive learning pre-training methods |                           |                           |                    |                    |                       |                    |  |
|                         | MoCo-v2 [7]                               | 26.31 ± 1.12              | 26.23 ± 1.20              | 58.14              | 58.30              | 0.5947 ↑0.0256        | 53.92 ↑0.76        |  |
|                         | CLIP [66]                                 | 42.70 ± 3.02              | 45.41 ± 2.90 ↑1.05        | 56.65              | 56.42              | <b>0.6147</b> ↑0.0456 | <b>57.04</b> ↑3.88 |  |
|                         | Ours                                      |                           |                           |                    |                    |                       |                    |  |
|                         | VisE-1.2M                                 | 44.67 ± 3.52 ↑1.05        | 45.74 ± 2.15 ↑1.38        | 59.15 ↓0.16        | 59.30 ↓0.15        | 0.6100 ↑0.0409        | 55.52 ↑2.36        |  |
|                         | VisE-250M                                 | <b>51.97</b> ± 4.08 ↑8.35 | <b>53.05</b> ± 1.48 ↑8.69 | <b>60.56</b> ↑1.25 | <b>60.31</b> ↑0.86 | 0.5784 ↑0.0093        | 54.48 ↑1.32        |  |
| ResNeXt-101<br>32 × 16d | Random Init                               | 37.96 ± 3.77              | 38.43 ± 1.38              | 57.05              | 56.92              | 0.5466                | 53.64              |  |
|                         | IN-Sup                                    | 63.09 ± 3.12              | 62.59 ± 1.99              | 59.24              | 59.42              | 0.5542                | 51.84              |  |
|                         | IG-940M-IN [55]                           | 55.86 ± 1.36              | 56.26 ± 1.32              | 60.98 ↑1.74        | <b>61.15</b> ↑1.73 | 0.5482                | 52.28 ↑0.44        |  |
|                         | VisE-1.2M (ours)                          | 56.64 ± 2.49 ↓6.45        | 56.26 ± 1.05 ↓6.33        | 59.70 ↑0.46        | 59.89 ↑0.47        | 0.5621 ↑0.0079        | 54.24 ↑2.40        |  |
|                         | VisE-250M (ours)                          | <b>69.61</b> ± 2.74 ↑6.51 | <b>69.44</b> ± 1.20 ↑6.85 | <b>61.08</b> ↑1.84 | 61.01 ↑1.59        | <b>0.5795</b> ↑0.0253 | <b>56.04</b> ↑4.20 |  |

Table 6. Linear evaluation experiments comparing VisE with other pre-training baselines. Colored text with ↑ and ↓ indicate the differences between VisE and IN-Sup with the same visual backbone. ↑ is also used if other methods yield better results than IN-Sup. In general, VisE outperforms the ImageNet supervised and hashtag-based weakly supervised pre-training methods.

| Backbone                | Method                                    | UnbiasedEmotion           |                            | Politics           |                    | Hateful Memes         |                    |  |
|-------------------------|-------------------------------------------|---------------------------|----------------------------|--------------------|--------------------|-----------------------|--------------------|--|
|                         |                                           | Val Accuracy              | Test Accuracy              | Val Accuracy       | Test Accuracy      | ROC AUC               | Accuracy           |  |
| ResNet-50               | Random Init                               | 39.01 ± 0.99              | 37.25 ± 2.12               | 58.28              | 58.31              | 0.5833                | 51.84              |  |
|                         | Uni-modality pre-training methods         |                           |                            |                    |                    |                       |                    |  |
|                         | IN-Sup                                    | 69.87 ± 3.27              | 67.94 ± 3.18               | 63.87              | 63.64              | 0.6005                | 54.32              |  |
|                         | VQAGrid [35]                              | 42.17 ± 3.07              | 43.93 ± 1.56               | 58.31              | 58.1               | 0.5906                | 53.24              |  |
|                         | Cross-modalities pre-training methods     |                           |                            |                    |                    |                       |                    |  |
|                         | VirTex [12]                               | 72.24 ± 2.13 ↑2.37        | 73.61 ± 1.94 ↑5.67         | 63.24              | 63.06              | 0.5898                | 53.84              |  |
|                         | ICMLM <sub>att-fc</sub> [2]               | 71.65 ± 2.31 ↑1.78        | 70.98 ± 2.01 ↑3.05         | 63.3               | 63.2               | 0.5846                | 53.52              |  |
|                         | ICMLM <sub>ifm</sub> [2]                  | 70.92 ± 1.65 ↑1.05        | 71.48 ± 1.78 ↑3.54         | 63.43              | 63.21              | 0.5842                | 53.40              |  |
|                         | Contrastive learning pre-training methods |                           |                            |                    |                    |                       |                    |  |
|                         | MoCo-v2 [7]                               | 77.63 ± 1.78 ↑7.76        | 76.23 ± 1.88 ↑8.29         | <b>66.24</b> ↑2.37 | <b>66.37</b> ↑2.73 | 0.5884                | 52.48              |  |
|                         | CLIP [66]                                 | 73.68 ± 0.93 ↑3.81        | 74.46 ± 1.21 ↑6.53         | 58.08              | 58.07              | 0.5470                | 53.48              |  |
|                         | Ours                                      |                           |                            |                    |                    |                       |                    |  |
|                         | VisE-1.2M                                 | 73.82 ± 1.07 ↑3.95        | 74.20 ± 1.93 ↑6.26         | 64.69 ↑0.82        | 64.69 ↑1.05        | <b>0.6070</b> ↑0.0039 | <b>55.88</b> ↑0.96 |  |
|                         | VisE-250M                                 | <b>79.74</b> ± 1.54 ↑9.87 | <b>78.89</b> ± 2.23 ↑10.95 | 65.83 ↑1.96        | 65.62 ↑1.98        | 0.6060 ↑0.0055        | 55.00 ↑0.68        |  |
| ResNet-101              | Random Init                               | 40.20 ± 2.76              | 39.08 ± 1.72               | 58.18              | 58.07              | 0.5868                | 53.48              |  |
|                         | IN-Sup                                    | 71.84 ± 2.72              | 72.43 ± 2.24               | 58.28              | 58.42              | 0.5939                | <b>54</b>          |  |
|                         | VisE-1.2M (ours)                          | <b>73.82</b> ± 0.77 ↑1.97 | <b>74.52</b> ± 1.18 ↑2.10  | <b>63.92</b> ↑5.64 | <b>63.85</b> ↑5.43 | <b>0.5958</b> ↑0.0019 | 52.96 ↓1.04        |  |
| ResNeXt-101<br>32 × 16d | Random Init                               | 40.20 ± 2.65              | 38.59 ± 0.91               | 58.26              | 58.39              | 0.5959                | <b>54.68</b>       |  |
|                         | IN-Sup                                    | 79.00 ± 2.33              | 77.92 ± 2.38               | 64.22              | 64.25              | 0.5903                | 52.92              |  |
|                         | IG-940M-IN [55]                           | 83.24 ± 1.68 ↑4.24        | 81.52 ± 1.76 ↑3.60         | 65.90 ↑1.68        | 65.58 ↑1.33        | 0.5951 ↑0.0048        | 54.28 ↑1.36        |  |
|                         | VisE-1.2M (ours)                          | 77.57 ± 2.43 ↓1.43        | 78.33 ± 1.39 ↑0.41         | 64.61 ↑0.39        | 64.44 ↑0.19        | 0.5976 ↑0.0073        | 54.40 ↑1.48        |  |
|                         | VisE-250M (ours)                          | <b>84.08</b> ± 1.87 ↑5.08 | <b>85.21</b> ± 1.24 ↑7.29  | <b>67.61</b> ↑3.39 | <b>67.64</b> ↑3.39 | <b>0.5957</b> ↑0.0054 | <b>54.96</b> ↑2.04 |  |

Table 7. Fine-tuning experiment comparing VisE with other pre-training baselines. Colored text with ↑ and ↓ indicate the differences with IN-Sup with the same visual backbone. ↑ is also used if other methods yield better results than IN-Sup. Similar to observations in Table 6, VisE can achieve better results compared to the ImageNet supervised and hashtag-based weakly supervised pre-training methods.

follow [50, 10] to stabilize the training processing by initializing the bias for the last linear classification layer with  $b = -\log((1 - \pi)/\pi)$ , where the prior probability  $\pi$  is set to 0.01. To obtain the pseudo-labels for the visual engagement signals, we set the number of clusters as 5000 and 128, for comments and raw reactions respectively.

**Other details** We spend around 9 hours to mine the data for pretraining with 3 server nodes (144 cpus). For the 1.23M data, the total word count for comments is 178M, the average  $\pm$  std number of comments per image is  $20.25 \pm 54.43$ , the average  $\pm$  std reactions count per image is  $81.21 \pm 601.4$ . We use Pytorch [63] to implement and train all the models on NVIDIA Tesla V100 GPUs.

| Dataset                          | Task                                      | # Classes | Train    | Val     | Test   |
|----------------------------------|-------------------------------------------|-----------|----------|---------|--------|
| Caltech-UCSD Birds-200-2011 [80] | Fine-grained bird species recognition     | 200       | 5994     | 5794    | -      |
| UnbiasedEmotion [62]             | Image emotion recognition                 | 6         | 2,131*   | 304*    | 610*   |
| Politics [75]                    | Visual political bias prediction          | 2         | 607,306* | 67,478* | 75,148 |
| Hateful Memes [40]               | Hate speech detection in multimodal memes | 2         | 8,500    | 500     | -      |

Table 8. Specifications of the various target task dataset. Image number with \* are the subset we randomly sampled since no publicly data splits are available. UnbiasedEmotion are randomly split 5 times.

| Task            | # GPUs | ResNet-50 (24M)        |                     | ResNet-101 (45M)       |                     | ResNeXt-101 (194M)     |                     |
|-----------------|--------|------------------------|---------------------|------------------------|---------------------|------------------------|---------------------|
|                 |        | Per Iteration (second) | Total Time (minute) | Per Iteration (second) | Total Time (minute) | Per Iteration (second) | Total Time (minute) |
| UnbiasedEmotion | 1      | 1.67                   | 49.64               | 1.44                   | 50.30               | 1.32                   | 63.37               |
| Politics        | 8      | 0.14                   | 216.26              | 0.18                   | 243.64              | 0.67                   | 721.61              |
| Hateful Memes   | 1      | 0.43                   | 41.23               | 0.32                   | 49.57               | 0.50                   | 140.81              |
| CUB-200-2011    | 1      | 0.74                   | 294.01              | -                      | -                   | 0.91                   | 1,304.01            |

Table 9. Average run time (per iteration and total) for fine-tuned experiments.

| Training Schedule | Method                          | Batch Size          | Linear Evaluation      |                                            |              |                                        | Fine-tuned                             |                                              |                                       |             |             |
|-------------------|---------------------------------|---------------------|------------------------|--------------------------------------------|--------------|----------------------------------------|----------------------------------------|----------------------------------------------|---------------------------------------|-------------|-------------|
|                   |                                 |                     | Base LR                | WD                                         | $S_{lr}$     | $S_{wd}$                               | Base LR                                | WD                                           | $S_{lr}$                              | $S_{wd}$    |             |
| UnbiasedEmotion   | ResNet-50                       | 128                 | Random Init            | {0.001, 0.01, 0.0001, 0.01, 0.01}          | 1.28 ± 0.38  | 0.36 ± 0.06                            | {0.0025, 0.025, 0.025, 0.0025, 0.0025} | {0.0001, 0.001, 0.01, 0.01, 0.01}            | 4.39 ± 0.75                           | 1.54 ± 0.54 |             |
|                   |                                 |                     | IN-Sup                 | {0.01, 0.001, 0.01, 0.01, 0.01}            | 10.52 ± 0.65 | 0.38 ± 0.26                            | {0.0025, 0.0025, 0.0025}               | {0.0001, 0.001, 0.001, 0.01, 0.0001}         | 7.35 ± 1.18                           | 2.10 ± 0.50 |             |
|                   |                                 |                     | MoCo-v2                | {0.0001, 0.01, 0.01, 0.0001, 0.0001}       | 3.06 ± 0.33  | 0.47 ± 0.18                            | 0.0025                                 | {0.0001, 0.0001, 0.0001, 0.01, 0.0001}       | 3.94 ± 0.47                           | 0.42 ± 0.28 |             |
|                   |                                 |                     | VQAGrid                | {0.0001, 0.01, 0.01, 0.001, 0.0001}        | 6.91 ± 0.57  | 0.51 ± 0.21                            | 0.00025                                | {0.0001, 0.01, 0.01, 0.01, 0.0001}           | 0.00 ± 0.00                           | 0.64 ± 0.39 |             |
|                   |                                 |                     | VirTex                 | {0.01, 0.0001, 0.01, 0.001, 0.001}         | 7.70 ± 0.45  | 0.41 ± 0.39                            | 0.0025                                 | {0.001, 0.001, 0.001, 0.01, 0.0001, 0.0001}  | 3.76 ± 0.64                           | 0.81 ± 0.25 |             |
|                   |                                 |                     | ICMLM <sub>at-fc</sub> | {0.01, 0.01, 0.0001, 0.01, 0.01}           | 2.20 ± 0.81  | 0.21 ± 0.07                            | 0.025                                  | {0.001, 0.0001, 0.01, 0.01, 0.0001}          | 12.38 ± 1.33                          | 0.76 ± 0.40 |             |
|                   |                                 |                     | ICMLM <sub>fm</sub>    | {0.01, 0.01, 0.01, 0.01, 0.01}             | 6.08 ± 1.17  | 0.83 ± 0.35                            | 0.025                                  | {0.01, 0.0001, 0.01, 0.01, 0.0001}           | 6.81 ± 0.44                           | 1.03 ± 0.46 |             |
|                   |                                 |                     | CLIP                   | {0.01, 0.01, 0.01, 0.001, 0.01}            | 9.88 ± 0.78  | 0.84 ± 0.29                            | 2.5e-05                                | {0.0001, 0.001, 0.01, 0.0001, 0.001}         | 19.42 ± 0.79                          | 4.36 ± 4.34 |             |
|                   |                                 |                     | VisE-1.2M              | {0.01, 0.01, 0.01, 0.01, 0.01}             | 10.04 ± 0.75 | 0.81 ± 0.52                            | 0.025                                  | {0.001, 0.001, 0.001, 0.001, 0.001}          | 3.36 ± 0.87                           | 1.84 ± 0.83 |             |
|                   |                                 |                     | VisE-250M              | 0.025                                      | 14.35 ± 2.10 | 1.07 ± 0.24                            | 0.0025                                 | {0.001, 0.01, 0.01, 0.01, 0.01}              | 11.24 ± 2.84                          | 1.77 ± 0.31 |             |
|                   | Total epochs: 50                | VisE-123k           | -                      | -                                          | -            | 0.025                                  | {0.01, 0.0001, 0.001, 0.001, 0.0001}   | 3.62 ± 0.84                                  | 0.68 ± 0.39                           |             |             |
|                   | LR steps: (0, 10, 20, 30)       | VisE-308k           | -                      | -                                          | -            | 0.025                                  | {0.001, 0.001, 0.001, 0.01, 0.0001}    | 3.21 ± 0.87                                  | 1.07 ± 0.63                           |             |             |
|                   | LR decay: (1, 0.1, 0.01, 0.001) | VisE-615k           | 128                    | -                                          | -            | {0.0025, 0.0025, 0.025, 0.025, 0.025}  | {0.0001, 0.0001, 0.0001, 0.001, 0.01}  | 2.98 ± 0.97                                  | 1.08 ± 0.64                           |             |             |
|                   |                                 | VisE-1.2M-C         | -                      | -                                          | -            | {0.0025, 0.0025, 0.0025, 0.025, 0.025} | {0.001, 0.0001, 0.0001, 0.001, 0.01}   | 3.00 ± 0.72                                  | 1.09 ± 0.79                           |             |             |
|                   |                                 | VisE- $\mathcal{R}$ | -                      | -                                          | -            | {0.025, 0.0025, 0.025, 0.025, 0.025}   | {0.001, 0.001, 0.001, 0.01, 0.01}      | 2.18 ± 0.63                                  | 0.94 ± 0.78                           |             |             |
|                   |                                 | ResNet-101          | 64                     | Random Init                                | -            | -                                      | -                                      | {0.0025, 0.00025, 0.00025, 0.00025, 0.00025} | {0.01, 0.0001, 0.001, 0.0001, 0.0001} | 5.79 ± 0.67 | 2.00 ± 1.08 |
|                   | IN-Sup                          |                     |                        | -                                          | -            | -                                      | 0.0025                                 | {0.01, 0.0001, 0.001, 0.01, 0.0001}          | 7.76 ± 2.69                           | 1.23 ± 0.51 |             |
|                   | VisE-1.2M                       |                     |                        | -                                          | -            | -                                      | 0.025                                  | {0.01, 0.0001, 0.0001, 0.0001, 0.0001}       | 3.16 ± 0.74                           | 1.04 ± 0.38 |             |
|                   | ResNeXt-101                     | 32                  | Random Init            | 0.025                                      | 0.0001       | 2.33 ± 1.12                            | 0.30 ± 0.13                            | 0.025                                        | {0.001, 0.0001, 0.01, 0.001, 0.001}   | 2.74 ± 0.88 | 0.93 ± 0.36 |
| IN-Sup            |                                 |                     | 0.025                  | {0.0001, 0.0001, 0.0001, 0.0001, 0.01}     | 9.92 ± 1.04  | 0.12 ± 0.12                            | 0.025                                  | {0.01, 0.0001, 0.001, 0.001, 0.0001}         | 12.79 ± 1.48                          | 1.37 ± 0.70 |             |
| IG-940M-IN        |                                 |                     | 0.025                  | {0.0001, 0.0001, 0.01, 0.001, 0.01}        | 10.15 ± 1.42 | 0.19 ± 0.12                            | 0.025                                  | {0.001, 0.001, 0.001, 0.0001, 0.0001}        | 15.21 ± 5.96                          | 1.25 ± 0.43 |             |
| VisE-1.2M         |                                 |                     | 0.025                  | {0.01, 0.01, 0.0001, 0.0001, 0.01, 0.0001} | 13.86 ± 0.80 | 0.32 ± 0.20                            | 0.0025                                 | {0.01, 0.001, 0.0001, 0.01, 0.001}           | 19.07 ± 8.31                          | 1.60 ± 0.29 |             |
| VisE-250M         |                                 |                     | 0.025                  | {0.0001, 0.01, 0.0001, 0.0001, 0.0001}     | 11.29 ± 0.79 | 0.12 ± 0.15                            | 0.0025                                 | {0.01, 0.001, 0.0001, 0.01, 0.0001}          | 13.73 ± 0.95                          | 0.31 ± 0.22 |             |

Table 10. Hyperparameter configurations for best-performing UnbiasedEmotion models for five random split. Single number are displayed if the configurations are the same across all five experiments.

## C.2. Other Pre-training Methods

We use the publicly available pre-trained models for other compared baseline methods<sup>4</sup> except for ImageNet pretraining with ResNeXt-101 backbone. We train that model with 100 epochs with learning rate decay schedule of (30, 60, 90) and scaling factor

<sup>4</sup>Links for the publicly available pre-trained models: [IG-940M-IN](#), [MoCo-v2](#), [VQAGrid](#), [VirTex](#), [ICMLM](#), [CLIP](#).

of 0.1. Note that the pre-trained model for CLIP adopts a modified ResNet-50 architecture. See [66] for details.

## C.3. Downstreaming Tasks Setup

**Tasks summary** The statistics of these tasks and the associated datasets are listed in Table 8.

|          | Training Schedule                                                     | Backbone   | Method                  | Batch Size | Linear Evaluation |        |          |          | Fine-tuned |        |          |          |
|----------|-----------------------------------------------------------------------|------------|-------------------------|------------|-------------------|--------|----------|----------|------------|--------|----------|----------|
|          |                                                                       |            |                         |            | Base LR           | WD     | $S_{lr}$ | $S_{wd}$ | Base LR    | WD     | $S_{lr}$ | $S_{wd}$ |
| Politics | Total epochs: 25<br>LR steps: (0, 10, 20)<br>LR decay: (1, 0.1, 0.01) | ResNet-50  | Random Init             | 192        | 0.0025            | 0.01   | 2.37     | 1.49     | 0.025      | 0.0001 | 0.66     | 0.80     |
|          |                                                                       |            | IN-Sup                  |            | 0.025             | 0.001  | 2.72     | 0.07     | 0.0025     | 0.001  | 1.81     | 0.82     |
|          |                                                                       |            | MoCo-v2                 |            | 0.025             | 0.0001 | 1.83     | 0.59     | 0.025      | 0.0001 | 0.75     | 3.46     |
|          |                                                                       |            | VQAGrid                 |            | 0.0025            | 0.01   | 2.02     | 0.36     | 0.00025    | 0.001  | 0.00     | 0.43     |
|          |                                                                       |            | VirTex                  |            | 0.025             | 0.001  | 2.58     | 0.44     | 0.025      | 0.0001 | 0.19     | 2.14     |
|          |                                                                       |            | ICMLM <sub>att-fc</sub> |            | 0.025             | 0.001  | 2.37     | 0.39     | 0.025      | 0.0001 | 1.06     | 2.05     |
|          |                                                                       |            | ICMLM <sub>rfm</sub>    |            | 0.025             | 0.001  | 2.90     | 0.31     | 0.025      | 0.0001 | 0.69     | 2.48     |
|          |                                                                       |            | CLIP                    |            | 0.025             | 0.001  | 1.54     | 0.05     | 0.000025   | 0.001  | 0.45     | 0.24     |
|          |                                                                       |            | VisE-1.2M               |            | 0.025             | 0.001  | 2.60     | 0.27     | 0.025      | 0.0001 | 0.61     | 2.23     |
|          |                                                                       |            | VisE-250M               |            | 0.025             | 0.001  | 2.69     | 0.34     | 0.00025    | 0.01   | 3.83     | 0.15     |
|          |                                                                       |            | VisE-123k               |            | -                 | -      | -        | -        | 0.025      | 0.0001 | 0.39     | 0.11     |
|          |                                                                       |            | VisE-308k               |            | -                 | -      | -        | -        | 0.025      | 0.0001 | 1.01     | 2.41     |
|          | VisE-615k                                                             | 192        | -                       | -          | -                 | 0.025  | 0.0001   | 0.72     | 1.71       |        |          |          |
|          | VisE-1.2M-C                                                           | -          | -                       | -          | -                 | 0.025  | 0.0001   | 0.42     | 2.54       |        |          |          |
|          | VisE- $\mathcal{R}$                                                   | -          | -                       | -          | -                 | 0.025  | 0.0001   | 0.36     | 2.17       |        |          |          |
|          | ResNet-101                                                            | 192        | Random Init             | -          | -                 | -      | -        | 0.025    | 0.001      | 0.48   | 0.69     |          |
|          |                                                                       |            | IN-Sup                  | -          | -                 | -      | -        | 0.025    | 0.0001     | 0.61   | 0.77     |          |
|          |                                                                       |            | VisE-1.2M               | -          | -                 | -      | -        | 0.025    | 0.0001     | 0.49   | 2.16     |          |
|          | ResNeXt-101                                                           | 192        | Random Init             | 0.0025     | 0.001             | 0.07   | 0.05     | 0.025    | 0.0001     | 0.61   | 0.80     |          |
|          |                                                                       |            | IN-Sup                  | 0.0025     | 0.0001            | 0.08   | 0.06     | 0.025    | 0.0001     | 1.26   | 1.76     |          |
|          |                                                                       | IG-940M-IN | 0.0025                  | 0.001      | 3.36              | 0.01   | 0.0025   | 0.0001   | 2.63       | 1.37   |          |          |
|          |                                                                       | VisE-1.2M  | 0.025                   | 0.0001     | 0.59              | 0.48   | 0.025    | 0.0001   | 0.80       | 2.74   |          |          |
|          |                                                                       | VisE-250M  | 0.025                   | 0.001      | 0.64              | 0.53   | 0.025    | 0.0001   | 0.16       | 2.03   |          |          |

Table 11. Hyperparameter configurations for best-performing Politics models. “Batch Size” presents the total mini batch size across 8GPUs. For fine-tuned settings, some learning processes are stopped early.

|               | Training Schedule                                           | Backbone   | Method                  | Batch Size | Linear Evaluation |        |          |          | Fine-tuned |        |          |          |
|---------------|-------------------------------------------------------------|------------|-------------------------|------------|-------------------|--------|----------|----------|------------|--------|----------|----------|
|               |                                                             |            |                         |            | Base LR           | WD     | $S_{lr}$ | $S_{wd}$ | Base LR    | WD     | $S_{lr}$ | $S_{wd}$ |
| Hateful Memes | Total epochs: 30<br>LR steps: (0, 20)<br>LR decay: (1, 0.5) | ResNet-50  | Random Init             | 64         | 0.025             | 0.01   | 0.0184   | 0.0022   | 0.025      | 0.01   | 0.0322   | 0.0014   |
|               |                                                             |            | IN-Sup                  |            | 0.025             | 0.01   | 0.0184   | 0.0006   | 0.025      | 0.0001 | 0.0346   | 0.0064   |
|               |                                                             |            | MoCo-v2                 |            | 0.025             | 0.01   | 0.0364   | 0.0009   | 0.025      | 0.001  | 0.0265   | 0.0022   |
|               |                                                             |            | VQAGrid                 |            | 0.025             | 0.01   | 0.0265   | 0.001    | 0.025      | 0.0001 | 0.0442   | 0.0426   |
|               |                                                             |            | VirTex                  |            | 0.025             | 0.01   | 0.0194   | 0.0018   | 0.025      | 0.001  | 0.0301   | 0.0011   |
|               |                                                             |            | ICMLM <sub>att-fc</sub> |            | 0.025             | 0.01   | 0.018    | 0.0002   | 0.025      | 0.001  | 0.0353   | 0.0011   |
|               |                                                             |            | ICMLM <sub>rfm</sub>    |            | 0.025             | 0.01   | 0.0217   | 0.002    | 0.025      | 0.01   | 0.0395   | 0.0024   |
|               |                                                             |            | CLIP                    |            | 0.025             | 0.01   | 0.0583   | 0.0007   | 0.00025    | 0.01   | 0        | 0.0021   |
|               |                                                             |            | VisE-1.2M               |            | 0.025             | 0.01   | 0.0453   | 0.0015   | 0.025      | 0.01   | 0.0403   | 0.0061   |
|               |                                                             |            | VisE-250M               |            | 0.025             | 0.01   | 0.0191   | 0.0018   | 0.025      | 0.0001 | 0.0284   | 0.0063   |
|               |                                                             |            | VisE-123k               |            | -                 | -      | -        | -        | 0.025      | 0.01   | 0.0452   | 0.0033   |
|               |                                                             |            | VisE-308k               |            | -                 | -      | -        | -        | 0.025      | 0.01   | 0.0324   | 0.0014   |
|               | VisE-615k                                                   | 64         | -                       | -          | -                 | 0.025  | 0.0001   | 0.0341   | 0.0074     |        |          |          |
|               | VisE-1.2M-C                                                 | -          | -                       | -          | -                 | 0.025  | 0.001    | 0.029    | 0.0033     |        |          |          |
|               | VisE- $\mathcal{R}$                                         | -          | -                       | -          | -                 | 0.025  | 0.001    | 0.0318   | 0.0043     |        |          |          |
|               | ResNet-101                                                  | 32         | Random Init             | -          | -                 | -      | -        | 0.025    | 0.01       | 0.0404 | 0.0062   |          |
|               |                                                             |            | IN-Sup                  | -          | -                 | -      | -        | 0.025    | 0.01       | 0.0378 | 0.0053   |          |
|               |                                                             |            | VisE-1.2M               | -          | -                 | -      | -        | 0.025    | 0.01       | 0.0368 | 0.0088   |          |
|               | ResNeXt-101                                                 | 16         | Random Init             | 0.00025    | 0.0001            | 0.0046 | 0        | 0.025    | 0.0001     | 0.0365 | 0.0015   |          |
|               |                                                             |            | IN-Sup                  | 0.025      | 0.01              | 0.02   | 0.0006   | 0.025    | 0.001      | 0.0348 | 0.009    |          |
|               |                                                             | IG-940M-IN | 0.025                   | 0.01       | 0.0308            | 0.001  | 0.025    | 0.01     | 0.032      | 0.0018 |          |          |
|               |                                                             | VisE-1.2M  | 0.025                   | 0.01       | 0.0273            | 0.0016 | 0.025    | 0.01     | 0.0404     | 0.0021 |          |          |
|               |                                                             | VisE-250M  | 0.025                   | 0.01       | 0.0161            | 0.0018 | 0.025    | 0.01     | 0.0324     | 0.0051 |          |          |

Table 12. Hyperparameter configurations for best-performing Hateful Memes models. The text encoder is used as a feature extractor in these experiments.

**Implementation** Similar to the pre-training models, we use Pytorch and NVIDIA Tesla V100 16GB GPUs for the transfer learning experiments. Table 9 summarizes other implementation details including average runtime. The same data augmentation are employed as the pretraining stage. To encode raw text of the multi-modal experiments, we use RoBERTa base from fairseq [61]<sup>5</sup>.

**Optimization and training details** We use stochastic gradient descent with 0.9 momentum for image only models and Adam optimization with decoupled weight decay [53] for multi-modal experiments. Following [55], we conduct a coarse grid

search to find the learning rate and weight decay values using val split. The learning rate is set as Base LR/256  $\times$  batchsize, where Base LR is chosen from {0.025, 0.0025, 0.00025}. For pre-training method CLIP, we expand the search to {0.025, 0.0025, 0.00025, 0.000025, 0.0000025}. The bound for weight decay is: {0.01, 0.001, 0.0001}. We also report the model performance sensitivity to learning rate ( $S_{lr}$ ) and weight decay ( $S_{wd}$ ) values.  $S_{lr}$  is defined as the standard deviation of the model performance across the range of learning rate considered given the optimal weight decay value. Similarly,  $S_{wd}$  is the standard deviation across the range of weight decay values given the optimal learning rate. Tables 10-16 show the training details and hyperparameter configurations of all the experiments in the main text.

<sup>5</sup>Link for the publicly available pre-trained RoBERTa-base model

|              | Training Schedule                                                              | Backbone    | Method      | Batch Size | Linear Evaluation |        |          |          | Fine-tuned |       |          |          |
|--------------|--------------------------------------------------------------------------------|-------------|-------------|------------|-------------------|--------|----------|----------|------------|-------|----------|----------|
|              |                                                                                |             |             |            | Base LR           | WD     | $S_{lr}$ | $S_{wd}$ | Base LR    | WD    | $S_{lr}$ | $S_{wd}$ |
| CUB-200-2011 | Total epochs: 300<br>LR steps:<br>(0, 100, 200)<br>LR decay:<br>(1, 0.1, 0.01) | ResNet-50   | Random Init | 128        | 0.025             | 0.001  | 1.17     | 0.20     | 0.025      | 0.01  | 23.12    | 14.49    |
|              |                                                                                |             | IN-Sup      |            | 0.025             | 0.001  | 25.25    | 0.62     | 0.025      | 0.01  | 10.14    | 0.99     |
|              |                                                                                |             | VisE-1.2M   |            | 0.025             | 0.0001 | 4.04     | 0.75     | 0.025      | 0.001 | 10.41    | 1.31     |
|              |                                                                                |             | VisE-250M   |            | 0.025             | 0.0001 | 3.87     | 0.94     | 0.025      | 0.001 | 4.71     | 0.80     |
|              | ResNeXt-101                                                                    | Random Init | 32          | 0.025      | 0.0001            | 1.86   | 0.91     | 0.025    | 0.01       | 27.50 | 8.04     |          |
|              |                                                                                | IN-Sup      |             | 0.025      | 0.0001            | 8.83   | 0.06     | 0.025    | 0.0001     | 2.97  | 3.23     |          |
|              |                                                                                | IG-940M-IN  |             | 0.025      | 0.0001            | 23.98  | 0.72     | 0.0025   | 0.001      | 1.13  | 0.00     |          |
|              |                                                                                | VisE-1.2M   |             | 0.025      | 0.001             | 3.28   | 0.96     | 0.025    | 0.001      | 29.39 | 0.60     |          |
|              |                                                                                | VisE-250M   |             | 0.025      | 0.0001            | 3.19   | 1.22     | 0.025    | 0.001      | 30.14 | 2.42     |          |

Table 13. Hyperparameter configurations for best-performing CUB-200-2011 models.

|               | Training Schedule                                                 | Backbone  | Method                  | Batch Size | Image + Text (Fine-tuned) |        |          |          |
|---------------|-------------------------------------------------------------------|-----------|-------------------------|------------|---------------------------|--------|----------|----------|
|               |                                                                   |           |                         |            | Base LR                   | WD     | $S_{lr}$ | $S_{wd}$ |
| Hateful Memes | Total epochs: 30<br>LR steps:<br>(0, 20)<br>LR decay:<br>(1, 0.5) | ResNet-50 | Random Init             | 64         | 0.00025                   | 0.001  | 0.04     | 0.0099   |
|               |                                                                   |           | IN-Sup                  |            | 0.00025                   | 0.001  | 0.0613   | 0.0052   |
|               |                                                                   |           | MoCo-v2                 |            | 0.00025                   | 0.01   | 0.0668   | 0.0005   |
|               |                                                                   |           | VQAGrid                 |            | 0.00025                   | 0.001  | 0.0497   | 0.0067   |
|               |                                                                   |           | VirTex                  |            | 0.00025                   | 0.001  | 0.0704   | 0.037    |
|               |                                                                   |           | ICMLM <sub>att-fc</sub> |            | 0.00025                   | 0.01   | 0.0684   | 0.0029   |
|               |                                                                   |           | ICMLM <sub>tfm</sub>    |            | 0.00025                   | 0.0001 | 0.0713   | 0.0073   |
|               |                                                                   |           | CLIP                    |            | 0.00025                   | 0.001  | 0        | 0.0026   |
|               | VisE-1.2M                                                         | 0.00025   | 0.0001                  | 0.0662     | 0.0039                    |        |          |          |
|               | VisE-250M                                                         | 0.00025   | 0.01                    | 0.0697     | 0.0045                    |        |          |          |
| ResNeXt-101   | IG-940M-IN                                                        | 16        | 0.00025                 | 0.001      | 0.0628                    | 0.0022 |          |          |
|               | VisE-250M                                                         |           | 0.00025                 | 0.01       | 0.0716                    | 0.0052 |          |          |

Table 14. Hyperparameter configurations for best-performing Hateful Memes models: Image + Text (Fine-tuned).

|               | Training Schedule                                                 | Backbone  | Method                  | Batch Size | Image Only (Fine-tuned) |        |          |          |
|---------------|-------------------------------------------------------------------|-----------|-------------------------|------------|-------------------------|--------|----------|----------|
|               |                                                                   |           |                         |            | Base LR                 | WD     | $S_{lr}$ | $S_{wd}$ |
| Hateful Memes | Total epochs: 30<br>LR steps:<br>(0, 20)<br>LR decay:<br>(1, 0.5) | ResNet-50 | Random Init             | 64         | 0.0025                  | 0.0001 | 0.0058   | 0.0043   |
|               |                                                                   |           | IN-Sup                  |            | 0.0025                  | 0.001  | 0.0206   | 0.0099   |
|               |                                                                   |           | MoCo-v2                 |            | 0.025                   | 0.01   | 0.0117   | 0.0015   |
|               |                                                                   |           | VQAGrid                 |            | 0.00025                 | 0.001  | 0        | 0.0154   |
|               |                                                                   |           | VirTex                  |            | 0.025                   | 0.0001 | 0.007    | 0.0171   |
|               |                                                                   |           | ICMLM <sub>att-fc</sub> |            | 0.025                   | 0.01   | 0.01     | 0.0186   |
|               |                                                                   |           | ICMLM <sub>tfm</sub>    |            | 0.025                   | 0.001  | 0.0146   | 0.0224   |
|               |                                                                   |           | CLIP                    |            | 0.00025                 | 0.001  | 0        | 0        |
|               | VisE-1.2M                                                         | 0.025     | 0.0001                  | 0.0168     | 0.0044                  |        |          |          |
|               | VisE-250M                                                         | 0.0025    | 0.01                    | 0.0185     | 0.0146                  |        |          |          |
| ResNeXt-101   | IG-940M-IN                                                        | 16        | 0.00025                 | 0.001      | 0.0146                  | 0.0023 |          |          |
|               | VisE-250M                                                         |           | 0.0025                  | 0.001      | 0.0161                  | 0.0122 |          |          |

Table 15. Hyperparameter configurations for best-performing Hateful Memes models: Image Only (Fine-tuned).

|               | Training Schedule                                                 | Backbone  | Method                  | Batch Size | Image Only (Linear) |        |          |          |
|---------------|-------------------------------------------------------------------|-----------|-------------------------|------------|---------------------|--------|----------|----------|
|               |                                                                   |           |                         |            | Base LR             | WD     | $S_{lr}$ | $S_{wd}$ |
| Hateful Memes | Total epochs: 30<br>LR steps:<br>(0, 20)<br>LR decay:<br>(1, 0.5) | ResNet-50 | Random Init             | 64         | 0.0025              | 0.0001 | 0.0075   | 0        |
|               |                                                                   |           | IN-Sup                  |            | 0.025               | 0.01   | 0.0055   | 0.0002   |
|               |                                                                   |           | MoCo-v2                 |            | 0.025               | 0.0001 | 0.0157   | 0.0004   |
|               |                                                                   |           | VQAGrid                 |            | 0.00025             | 0.0001 | 0.0125   | 0.0004   |
|               |                                                                   |           | VirTex                  |            | 0.025               | 0.01   | 0.0078   | 0.0007   |
|               |                                                                   |           | ICMLM <sub>att-fc</sub> |            | 0.025               | 0.001  | 0.006    | 0.0001   |
|               |                                                                   |           | ICMLM <sub>tfm</sub>    |            | 0.025               | 0.01   | 0.0179   | 0.0001   |
|               |                                                                   |           | CLIP                    |            | 0.025               | 0.01   | 0.043    | 0.0004   |
|               | VisE-1.2M                                                         | 0.0025    | 0.0001                  | 0.0089     | 0                   |        |          |          |
|               | VisE-250M                                                         | 0.025     | 0.01                    | 0.0291     | 0.0009              |        |          |          |
| ResNeXt-101   | IG-940M-IN                                                        | 16        | 0.025                   | 0.01       | 0.0092              | 0.0004 |          |          |
|               | VisE-250M                                                         |           | 0.025                   | 0.01       | 0.0299              | 0.0018 |          |          |

Table 16. Hyperparameter configurations for best-performing Hateful Memes models: Image Only (Linear).
